# Supplementary material
Source: Royal Society of Chemistry journal article supplement (https://www.rsc.org/suppdata/jm/1999/2991/905098a.doc)
Supplement: Supplementary file 1 [file 905098a.doc]

Supplementary Information: Elemental Analyses for compounds **6**–**10** and **13**.

**6a**: Calcd (%) for C22H20NO6Cl: C, 61.47; H, 4.69; N, 3.26.

Found: C, 61.01; H, 4.77; N, 3.31.

**6b**: Calcd (%) for C23H22NO7Cl: C, 60.07; H, 4.82; N, 3.05.

Found: C, 59.51; H, 4.58; N, 2.80.

**6c**: Calcd (%) for C23H22NO6Cl: C, 62.24; H, 5.00; N, 3.16.

Found: C, 61.98; H, 4.71; N, 3.02.

**6d**: Calcd (%) for C22H19NO6BrCl: C, 51.94; H, 3.76; N, 2.75.

Found: C, 51.70; H, 3.61; N, 2.57.

**6e**: Calcd (%) for C22H19N2O8Cl•0.5H2O: C, 54.61; H, 4.17; N, 5.79.

Found: C, 54.85; H, 3.81; N, 5.75.

**7a**: Calcd (%) for C22H20NOSI: C, 55.82 H, 4.26; N, 2.96.

Found: C, 55.42; H, 3.84; N, 2.64.

**7b**: Calcd (%) for C23H22NO2SI: C, 54.88; H, 4.40; N, 2.78.

Found: C, 54.61; H, 4.28; N, 2.89.

**7c**: Calcd (%) for C23H22NOSI: C, 56.68; H, 4.55; N, 2.87.

Found: C, 56.64; H, 4.34; N, 2.66.

**7d**: Calcd (%) for C22H19NOSBrI: C, 47.85; H, 3.47; N, 2.54.

Found: C, 47.62; H, 3.32; N, 2.62.

**7e**: Calcd (%) for C22H19N2O3SI: C, 50.98; H, 3.69; N, 5.40.

Found: C, 50.95; H, 3.32; N, 5.60.

**8a**: Calcd (%) for C22H20NO2I•0.5H2O: C, 56.67; H, 4.54; N, 3.00.

Found: C, 56.65; H, 4.51; N, 2.98.

**8b**: Calcd (%) for C23H22NO3I: C, 56.69; H, 4.55; N, 2.87.

Found: C, 57.03; H, 4.42; N, 2.78.

**8c**: Calcd (%) for C23H22NO2I•0.5H2O: C, 57.51; H, 4.83; N, 2.92.

Found: C, 57.51; H, 4.52; N, 2.73.

**8d**: Calcd (%) for C22H19NO2BrI: C, 49.28; H, 3.57; N, 2.61.

Found: C, 49.19; H, 3.37; N, 2.55.

**8e**: Calcd (%) for C22H19N2O4I•0.5H2O: C, 51.68; H, 3.94; N, 5.48.

Found: C, 52.00; H, 3.68; N, 5.57.

**9**: Calcd (%) for C28H24NO5SCl: C, 64.43; H, 4.63; N, 2.68.

Found: C, 64.36; H, 4.52; N, 2.82.

**10**: Calcd (%) for C28H24NOSI: C, 61.21 H, 4.40; N, 2.55.

Found: C, 61.55; H, 4.33; N, 2.46.

**13**: Calcd (%) for C46H40BNOS: C, 83.00; H, 6.06; N, 2.10.

Found: C, 82.58; H, 5.97; N, 1.82.
